# Supplementary material for: Investigation and Computational Analysis of the Sulfotransferase (SOT) Gene Family in Potato (Solanum tuberosum): Insights into Sulfur Adjustment for Proper Development and Stimuli Responses
Source: MDPI journal article supplement (doi:10.3390/plants10122597), 2021-11-26
Supplement: s1 [file s1]

**Table S1** The identified *StSOT* gene family members with Sulfotransferase domain (PF00685) from the *Solanum tuberosum* genome. The proteins post-translational phosphorylation changes have been investigated.

| Gene symbol    | Protein length (aa) | Phosphorylation sites <sup>a</sup> | Score |
|----------------|---------------------|------------------------------------|-------|
| <i>StSOT01</i> | 296                 | 14 S TSRLSENYG                     | 0.986 |
|                |                     | 41 S PKRESEYPF                     | 0.979 |
|                |                     | 151 S LLPISILES                    | 0.978 |
|                |                     | 186 S KAKLSTKVS                    | 0.991 |
|                |                     | 222 S YWKASVERP                    | 0.992 |
|                |                     | 257 S DKPLSKEEE                    | 0.998 |
| <i>StSOT02</i> | 345                 | 222 S YWKASVEKP                    | 0.984 |
|                |                     | 257 S DKPFSKEEQ                    | 0.998 |
| <i>StSOT03</i> | 337                 | 24 S QETLSEEL                      | 0.996 |
|                |                     | 190 S IRPESLGPL                    | 0.988 |
|                |                     | 291 S KGAI SVFEN                   | 0.991 |
|                |                     | 320 S FERLSNVMD                    | 0.952 |
| <i>StSOT04</i> | 344                 | 16 S EEEASSKFK                     | 0.961 |
|                |                     | 64 S NFKSSWNDI                     | 0.991 |
|                |                     | 69 Y WNDIYICSA                     | 0.979 |
|                |                     | 117 S LEFDSPKHS                    | 0.991 |
|                |                     | 150 S QSLDSTKMI                    | 0.981 |
|                |                     | 191 S ELLISFEEG                    | 0.995 |
|                |                     | 255 S GKPSRDEE                     | 0.986 |
| <i>StSOT05</i> | 350                 | 250 S EQPFSLEEQ                    | 0.993 |
|                |                     | 309 S KNHLSEEMI                    | 0.973 |
| <i>StSOT06</i> | 326                 | 14 S IIDSSQSSE                     | 0.960 |
|                |                     | 16 S DSSQSSEEK                     | 0.997 |
|                |                     | 17 S SSQSSEEKD                     | 0.995 |
|                |                     | 121 S SSIYSTKPT                    | 0.988 |
|                |                     | 216 S YWSESQKRT                    | 0.997 |
|                |                     | 264 S VWRCSLERL                    | 0.992 |
| <i>StSOT07</i> | 101                 | 80 S TVEMSEKLN                     | 0.976 |
| <i>StSOT08</i> | 101                 | 54 S NEKLSTGER                     | 0.953 |
| <i>StSOT09</i> | 313                 | 78 S IVNRSSKES                     | 0.996 |
|                |                     | 79 S VNRSSKESL                     | 0.997 |
|                |                     | 201 S FRKASLEKP                    | 0.992 |
| <i>StSOT10</i> | 330                 | 148 S SLPKSIKDS                    | 0.998 |
|                |                     | 186 S KDIHSIEEI                    | 0.991 |
|                |                     | 199 S CKGVSPYGP                    | 0.975 |
|                |                     | 250 S ECPFSIEEE                    | 0.959 |
| <i>StSOT11</i> | 335                 | 7 S KSQTSPQIP                      | 0.974 |
|                |                     | 77 T ILVTTPKSG                     | 0.959 |
|                |                     | 142 S PRLSTHMP                     | 0.967 |
|                |                     | 153 S SLPKSVQDS                    | 0.996 |
|                |                     | 157 S SVQDSKTKL                    | 0.972 |
|                |                     | 255 S ECPFSIEEE                    | 0.959 |
|                |                     | 288 S DGKLSTGEE                    | 0.964 |
| <i>StSOT12</i> | 335                 | 8 S SQTSSPTPP                      | 0.991 |
|                |                     | 77 T ILVTTPKSG                     | 0.959 |
|                |                     | 153 S SLPKSVQDS                    | 0.997 |
|                |                     | 157 S SVQDSRTKL                    | 0.969 |
|                |                     | 191 S IDTNSIEEM                    | 0.981 |
|                |                     | 255 S EFPFSIEEE                    | 0.972 |
|                |                     | 288 S NGKLSTGEE                    | 0.995 |

|                |     |                 |       |
|----------------|-----|-----------------|-------|
| <i>StSOT13</i> | 308 | 148 S SLPKSVKDS | 0.998 |
|                |     | 152 S SVKDSKTKL | 0.979 |
|                |     | 186 S KDIHSIEEI | 0.991 |
|                |     | 199 S CKGVSPYGP | 0.975 |
|                |     | 250 S ECPFSIEEE | 0.959 |
| <i>StSOT14</i> | 329 | 15 S EDSLSEECK  | 0.981 |
|                |     | 71 T ILVTTPKSG  | 0.959 |
|                |     | 118 Y EHTLYVDGQ | 0.963 |
|                |     | 147 S SLPKSIMDS | 0.997 |
|                |     | 249 S ECPFSMEEE | 0.972 |
|                |     | 266 S LRMCSFENL | 0.969 |
| <i>StSOT15</i> | 330 | 282 S NGKLSTGEG | 0.994 |
|                |     | 16 S QEGLSEECK  | 0.985 |
|                |     | 36 Y WMESYIYNY  | 0.962 |
|                |     | 148 S SLPKSVQDS | 0.996 |
|                |     | 152 S SVQDSKTKL | 0.972 |
| <i>StSOT16</i> | 332 | 199 S CKGVSPYGP | 0.975 |
|                |     | 250 S ECPFSIEEE | 0.959 |
|                |     | 7 S TSQNSPPKY   | 0.976 |
|                |     | 17 S QEDQSEECK  | 0.973 |
|                |     | 73 S ILVTSPKSG  | 0.996 |
|                |     | 149 S SLPKSVKNS | 0.997 |
|                |     | 217 S YWKESIENP | 0.990 |
| <i>StSOT17</i> | 240 | 252 S ECPFSIEEE | 0.959 |
|                |     | 269 S LRMCSFENL | 0.969 |
|                |     | 42 T SSFTTPRLL  | 0.984 |
|                |     | 58 S SLPKSAQDS  | 0.995 |
|                |     | 62 S SAQDSKTKL  | 0.954 |
|                |     | 96 S KDTNSIEEM  | 0.983 |
|                |     | 160 S ECPFSIKEE | 0.971 |
| <i>StSOT18</i> | 269 | 193 S TGKLSTGEE | 0.991 |
|                |     | 219 S TTEMSEKFN | 0.972 |
|                |     | 93 S VLLDSIKNS  | 0.995 |
| <i>StSOT19</i> | 268 | 161 S YWEEKSKRP | 0.952 |
|                |     | 247 T KNHMTPKME | 0.966 |
|                |     | 63 S EVMHSYSKT  | 0.990 |
| <i>StSOT20</i> | 209 | 93 S ILPNSIKNS  | 0.975 |
|                |     | 130 S LEDLSPLEE | 0.995 |
|                |     | 4 Y -MDYYLKTP   | 0.953 |
| <i>StSOT21</i> | 359 | 33 S VLPDSIKNL  | 0.997 |
|                |     | 71 S LEDLSPLEE  | 0.995 |
|                |     | 10 Y SPPGYNNPT  | 0.969 |
|                |     | 34 S LQDDSLSEE  | 0.960 |
|                |     | 36 S DDSLSEECK  | 0.979 |
|                |     | 133 S VLVPSPERT | 0.993 |
| <i>StSOT22</i> | 226 | 168 S SLPKSVLDS | 0.996 |
|                |     | 272 S ECPFSIEEE | 0.959 |
|                |     | 8 S SQSSSPKYL   | 0.995 |
|                |     | 11 Y SSPKYLQED  | 0.961 |
|                |     | 17 S QEDLSEERK  | 0.993 |
|                |     | 73 S ILVTSPKSG  | 0.996 |
|                |     | 149 S SLPKSVQNS | 0.973 |
|                |     | 188 S KDTNSIEEM | 0.983 |
|                |     | 217 S YWKKSIENS | 0.994 |
|                |     | 221 S SIENSDKDF | 0.997 |

|                |     |                                                                                                              |                                                    |
|----------------|-----|--------------------------------------------------------------------------------------------------------------|----------------------------------------------------|
| <i>StSOT23</i> | 118 | -                                                                                                            | -                                                  |
| <i>StSOT24</i> | 316 | 140 S VLPDSFKNS<br>178 S LENPSPLEE<br>294 T KNHMTPKME                                                        | 0.997<br>0.990<br>0.966                            |
| <i>StSOT25</i> | 244 | 35 S INFTSLDDT<br>56 S CLPQSIIDS<br>127 S YRKASKDHH<br>164 S GKPFSEEEE                                       | 0.976<br>0.994<br>0.972<br>0.997                   |
| <i>StSOT26</i> | 329 | 15 S EDNLSEECK<br>71 T ILVTTPKSG<br>147 S SLPKSVQDS<br>151 S SVQDSKTKL<br>185 S NDTNSIEEM<br>282 S NGKFSTGEA | 0.956<br>0.959<br>0.996<br>0.972<br>0.980<br>0.996 |
| <i>StSOT27</i> | 161 | 17 S KDTNSIEEM<br>81 S ECPFSIEEE<br>114 S NGKFSTGEP                                                          | 0.983<br>0.959<br>0.996                            |
| <i>StSOT28</i> | 105 | 25 S ECPFSIEEG<br>58 S NGKFSTGEE                                                                             | 0.970<br>0.996                                     |
| <i>StSOT29</i> | 106 | -                                                                                                            | -                                                  |

<sup>a</sup> The phosphorylation regions as the post-transcriptional changes predicted in S: serine , T: threonine and Y: tyrosine residues from StSOT proteins (with the scores higher than 0.950)
