# Supplementary material for: Investigation and Computational Analysis of the Sulfotransferase (SOT) Gene Family in Potato (Solanum tuberosum): Insights into Sulfur Adjustment for Proper Development and Stimuli Responses
Source: MDPI journal article supplement (doi:10.3390/plants10122597), 2021-11-26
Supplement: s1 [file s1]

**Table S2.** The conserved motifs predicted in StSOT protein sequences

| Motif   | Sites | E-value | Amino acid sequence of motif                        | Width<br>(aa) | Specific<br>domain/region   |
|---------|-------|---------|-----------------------------------------------------|---------------|-----------------------------|
| Motif 1 | 18    | 4.3e-4  | NYQGFWTSPRFJQGVACQQQFQAQDSDIILVTTPKSGTTWL           | 42            | Sulfotransfer_1<br>(5' PSB) |
| Motif 2 | 24    | 2.1e-4  | EEMFELFCKGVSLYGPFWBHVLDYWKQSI                       | 29            | Sulfotransfer_1             |
| Motif 3 | 25    | 2.0e-3  | KYEEJKKDPKIZLKRLAEFLECPFSIEEE                       | 29            | Sulfotransfer_1             |
| Motif 4 | 24    | 2.5e-5  | ENKAFFRKGEVGDWKNYFTIEMSEKLBHITEQKFQGSGLKF           | 41            | Sulfotransfer_1             |
| Motif 5 | 27    | 1.5e-3  | DEILKMCSFENLSNLEVNKNG                               | 21            | -                           |
| Motif 6 | 22    | 6.2e-3  | VYJCRNPKDTFISMWHFTNNLR                              | 22            | Sulfotransfer_1<br>(3' PB)  |
| Motif 7 | 11    | 2.2e-3  | PIFEQNHPLLVKNP HDLVPFLELTLYVDGQVPBFSSFTSPRLLSTHVPFA | 50            | -                           |
| Motif 8 | 10    | 3.2e-1  | LQZEGLSEECKLLSTLPKEKGWMSGYIY                        | 29            | -                           |
